# Supplementary material
Source: Springer Nature journal article supplement (https://www.springermedizin.de/resource/supplementary/12889_2006_516_MOESM1_ESM.pdf/9501056)

### Perceived Mental Health

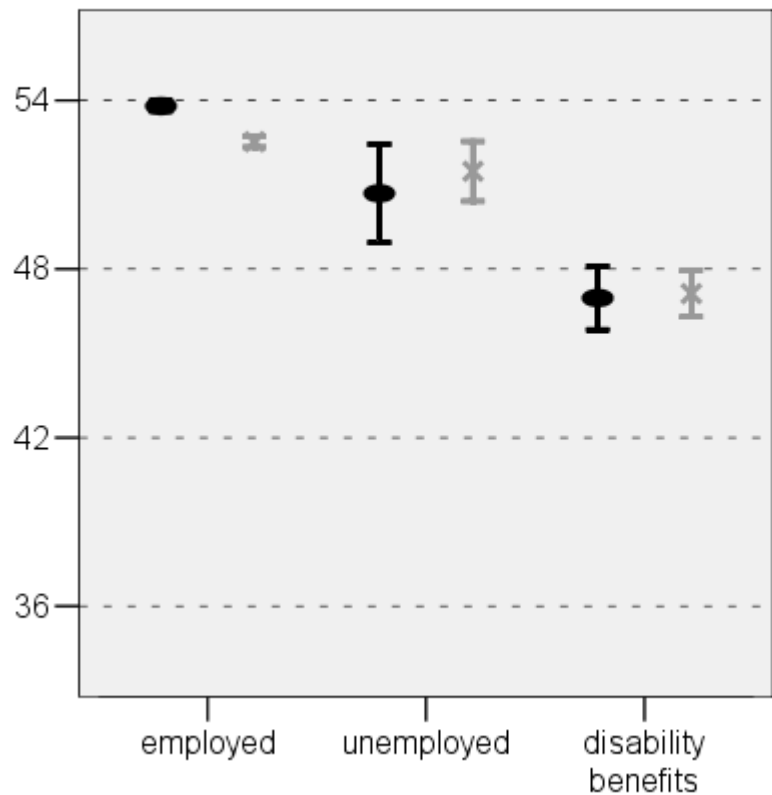

### Perceived Physical Health

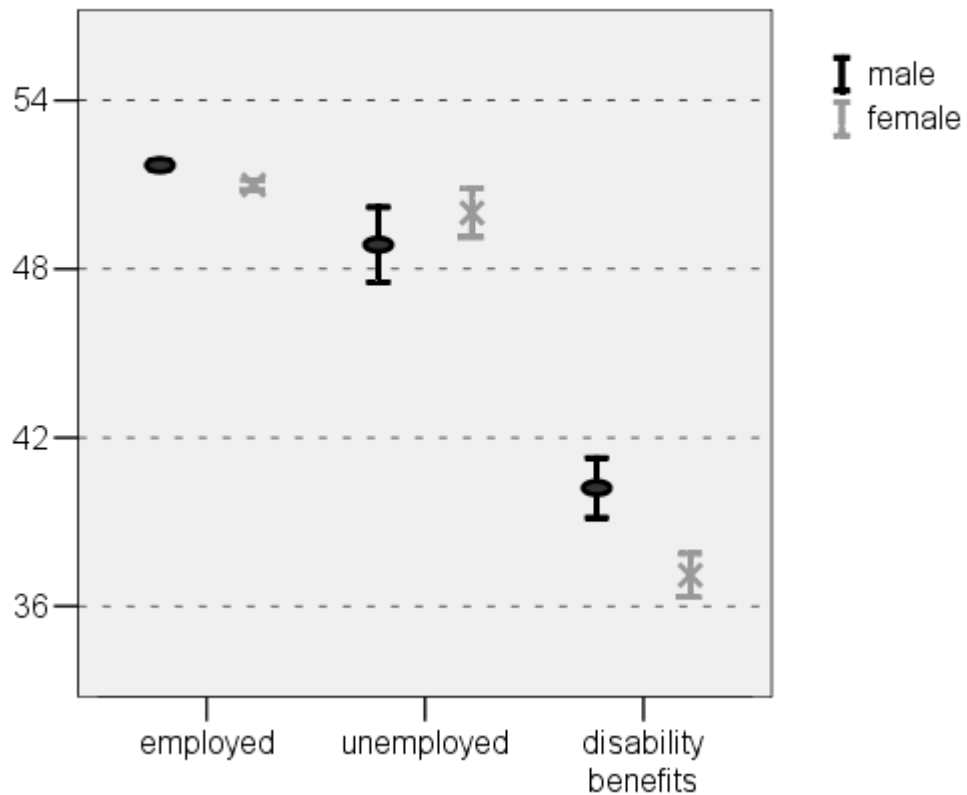

Supplement: MOESM1 [file 9501056]
